# Supplementary material for: Mitochondrial phosphoenolpyruvate carboxykinase (PEPCK-M) regulates the cell metabolism of pancreatic neuroendocrine tumors (pNET) and de-sensitizes pNET to mTOR inhibitors
Source: PubMed Central journal article supplement (PMC5732754; doi:10.18632/oncotarget.21665), 2017-10-09
Supplement: oncotarget-08-103613-s001.pdf [file oncotarget-08-103613-s001.pdf]

## Mitochondrial phosphoenolpyruvate carboxykinase (PEPCK-M) regulates the cell metabolism of pancreatic neuroendocrine tumors (pNET) and de-sensitizes pNET to mTOR inhibitors

### SUPPLEMENTARY MATERIALS

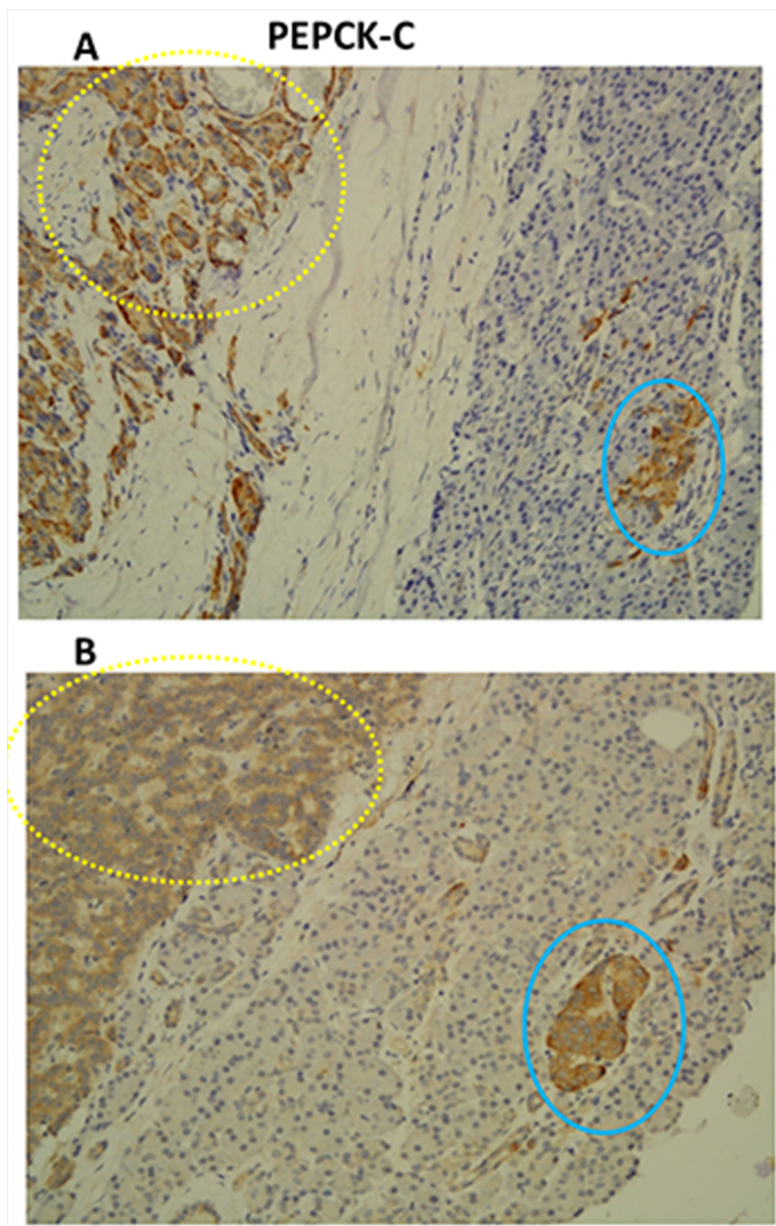

**Supplementary Figure 1: The PEPCK-C expression in pNET patients.** (A) The expression pattern of PEPCK-C in the tumor and islet cells of the patient shown in Figure 1A. (B) The expression pattern of PEPCK-C in the tumor and islet cells of the patient shown in Figure 1B. The tumor cells are marked within yellow dashed circles, and the islet cells are marked within blue circles.

### QGP-1

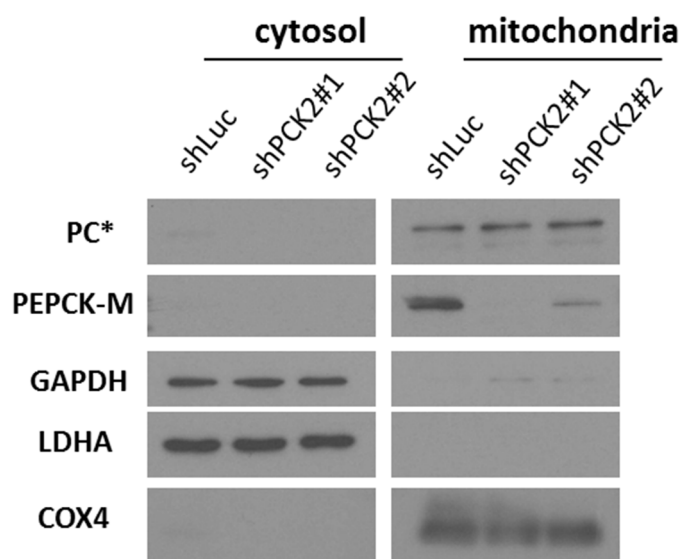

Supplementary Figure 2: The protein expression of pyruvate carboxylase in QGP-1/shLuc and QGP-1/shPCK2 (#1 and #2) cells were not significantly different. Pyruvate carboxylase and PEPCK-M were located in mitochondrial.

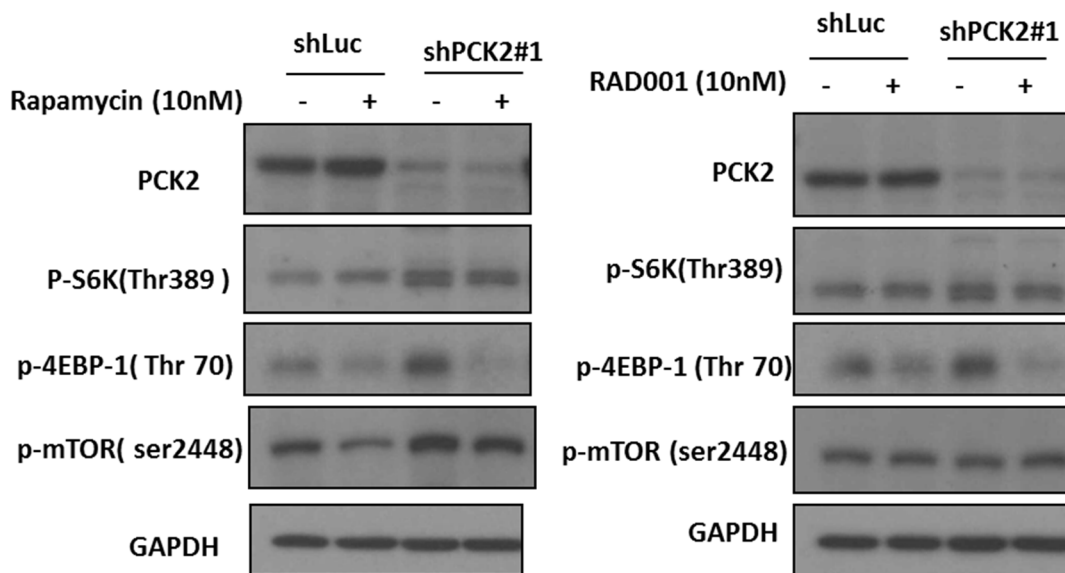

Supplementary Figure 3: The protein expression of phosphorylated mTOR and its downstream targets S6K and 4EBP-1 of QGP-1/shLuc and QGP-1/shPCK2#1 cells with or without Rapamycin or RAD001 treatment.

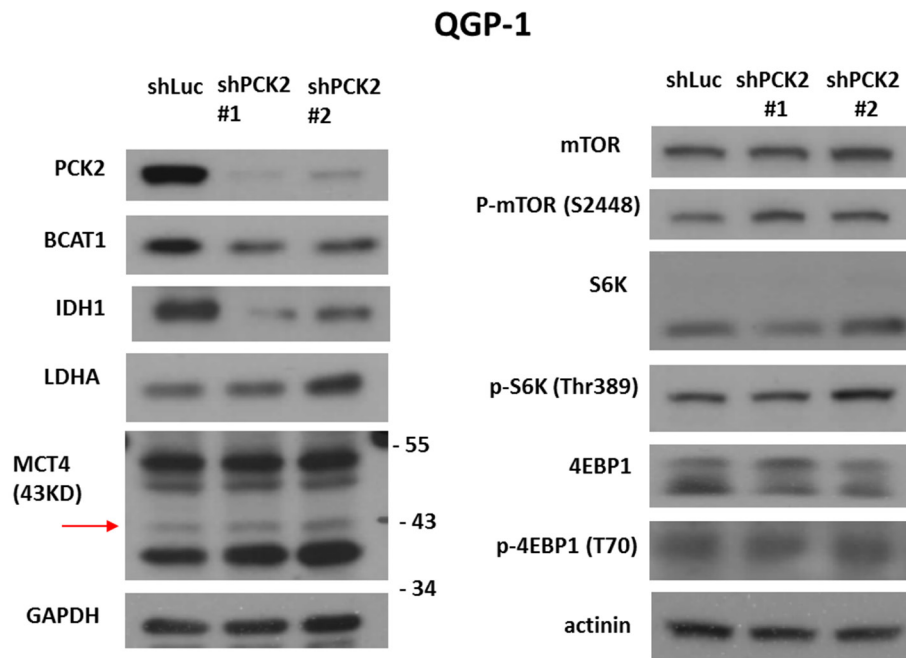

**Supplementary Figure 4:** The protein expression of mTORC1-related genes, BCAT1 and IDH1, glycolysis-related genes, LDHA and MCT4, and mTOR and the downstream targets of mTOR in QGP-1/shLuc and QGP-1/shPCK2 (#1 and #2) cells.

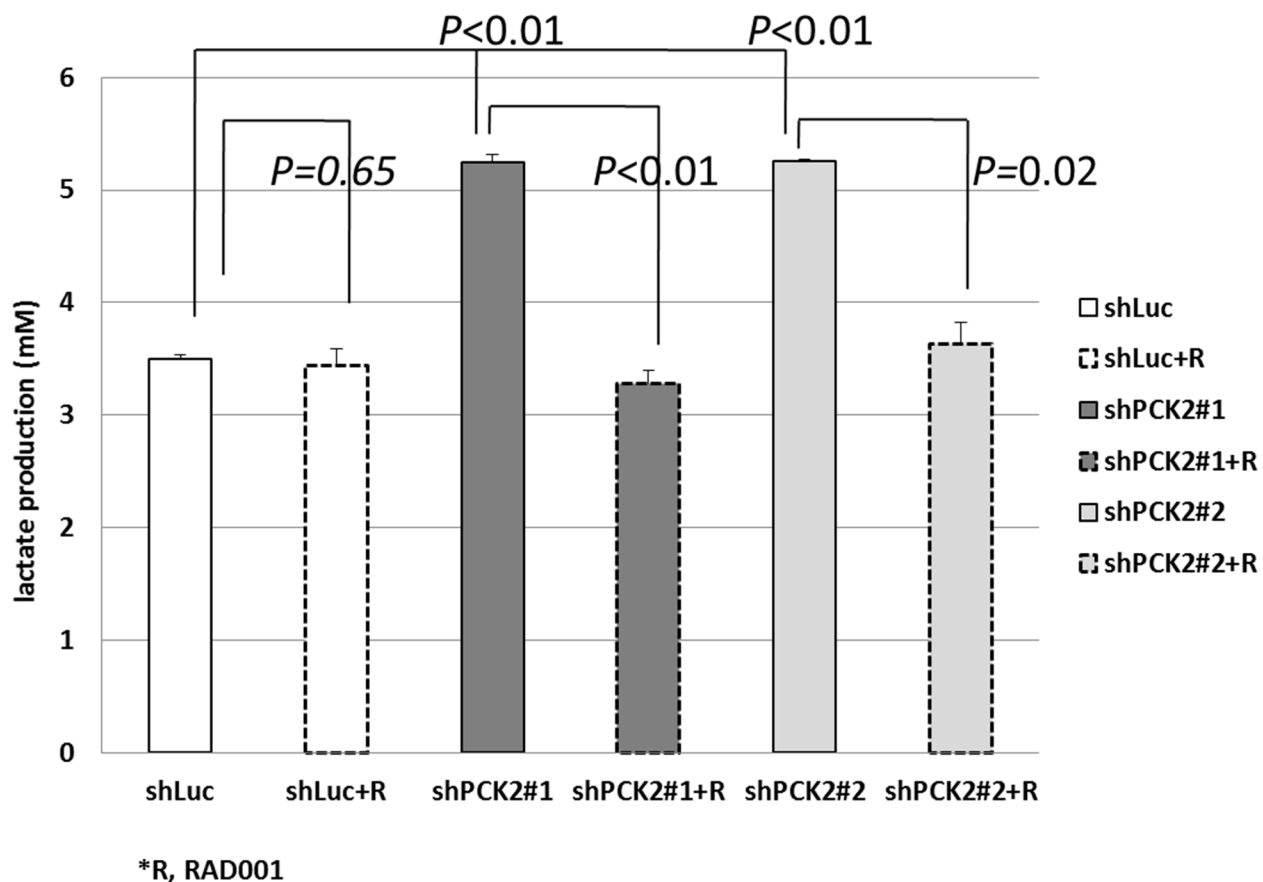

Supplementary Figure 5: The lactate level of QGP-1/shLuc and QGP-1/shPCK2 (#1 and #2) cells with or without RAD001 treatment.

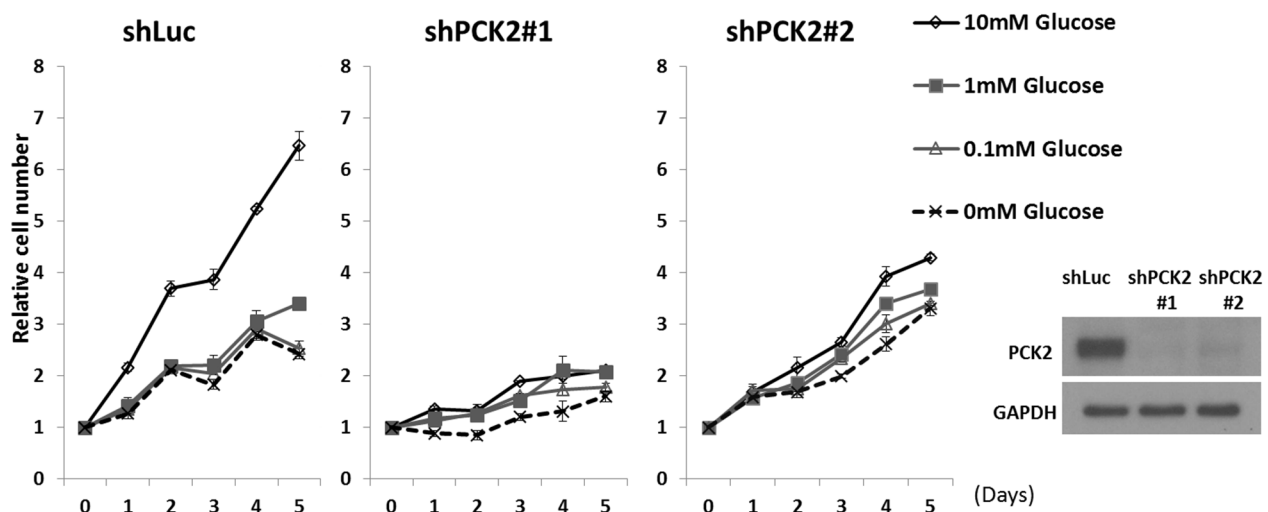

Supplementary Figure 6: The proliferative rate of QGP-1/shLuc and QGP-1/shPCK2 (#1 and #2) cells cultured under normal (10mM), low (1 and 0.1mM) or no (0mM) glucose-contained medium.

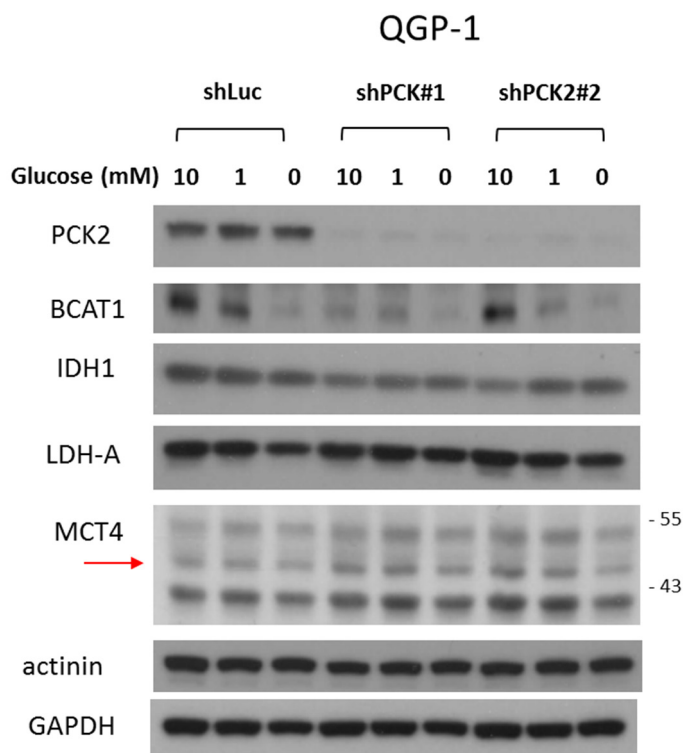

Supplementary Figure 7: The protein expression of mTORC1-related genes, BCAT1 and IDH1, and glycolysis-related genes, LDHA and MCT4, in QGP-1/shLuc and QGP-1/shPCK2 (#1 and #2) cells cultured under normal (10mM), low (1mM), and no glucose-contained medium.

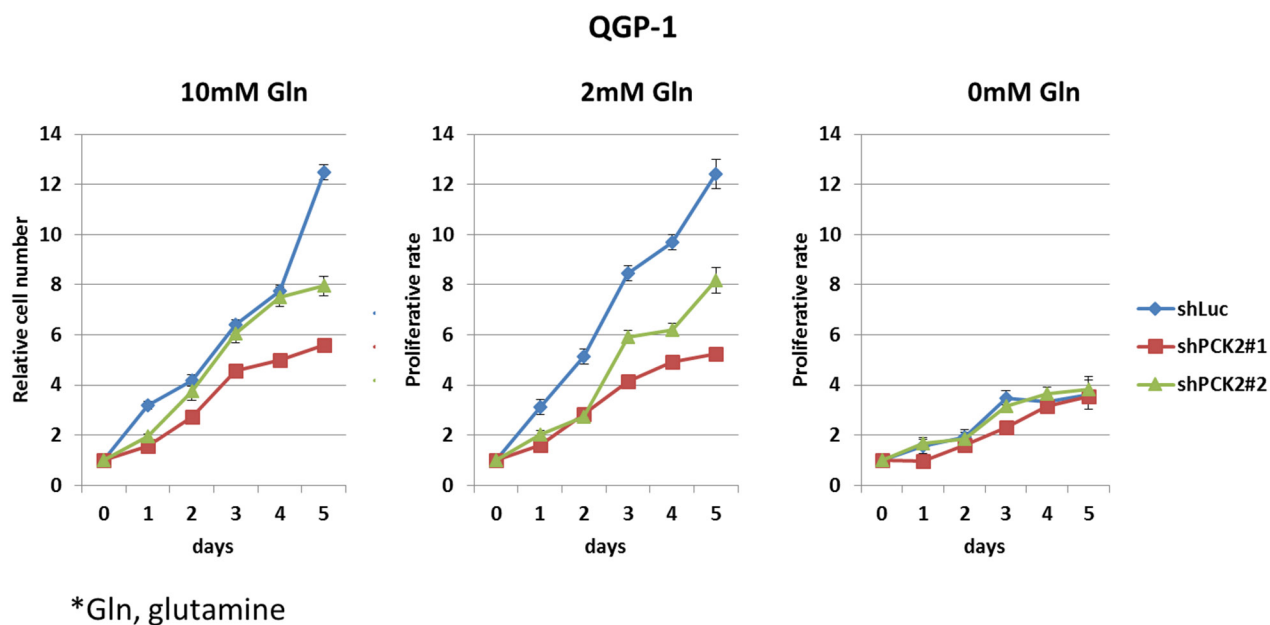

Supplementary Figure 8: The proliferative rate of QGP-1/shLuc and QGP-1/shPCK2 (#1 and #2) cells cultured under high (10mM), normal (2mM) or no (0mM) glutamine-contained medium.

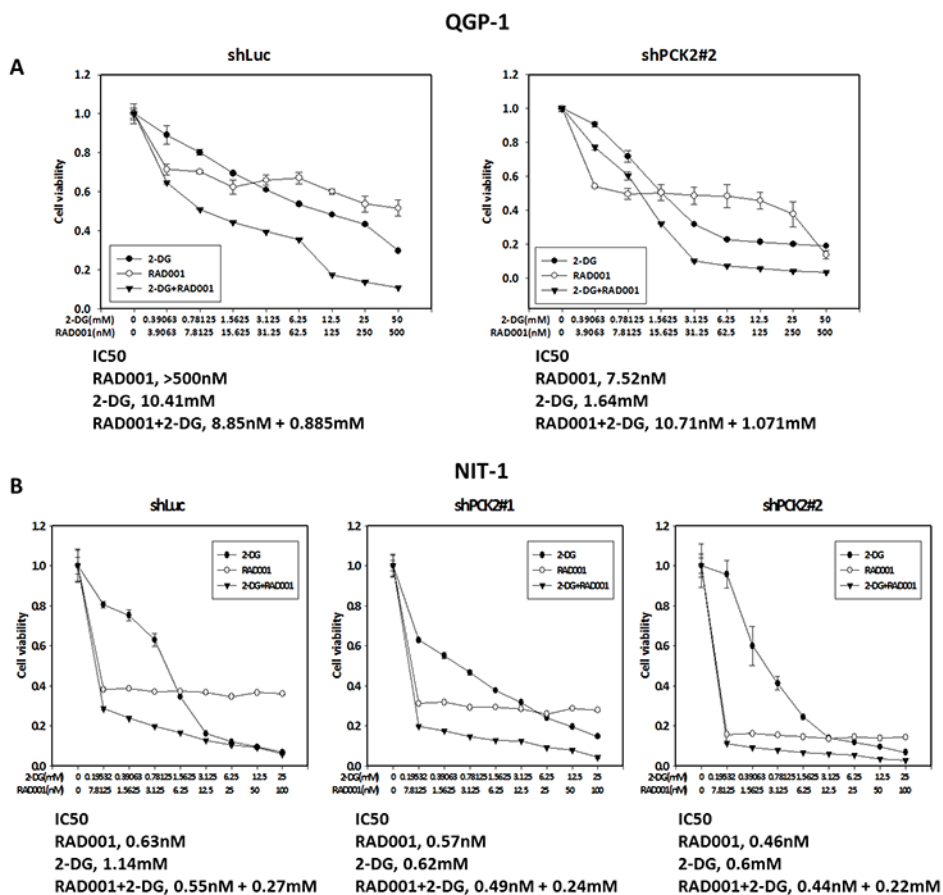

**Supplementary Figure 9: The cell viability of QGP-1 and NIT-1 cells with or without knockdown of PCK2 treated with RAD001 alone, 2-DG alone or combination of RAD001 and 2-DG. (A) The cell viability of QGP-1/shLuc and QGP-1/shPCK2 #2 cells treated without or with indicated doses of 2-DG alone, RAD-001 alone or combination of 2-DG and RAD001. (B) The cell viability of NIT-1/shLuc and NIT-1/shPck2 (#1 and #2) cells treated without or with indicated doses of 2-DG alone, RAD-001 alone or combination of 2-DG and RAD001.**

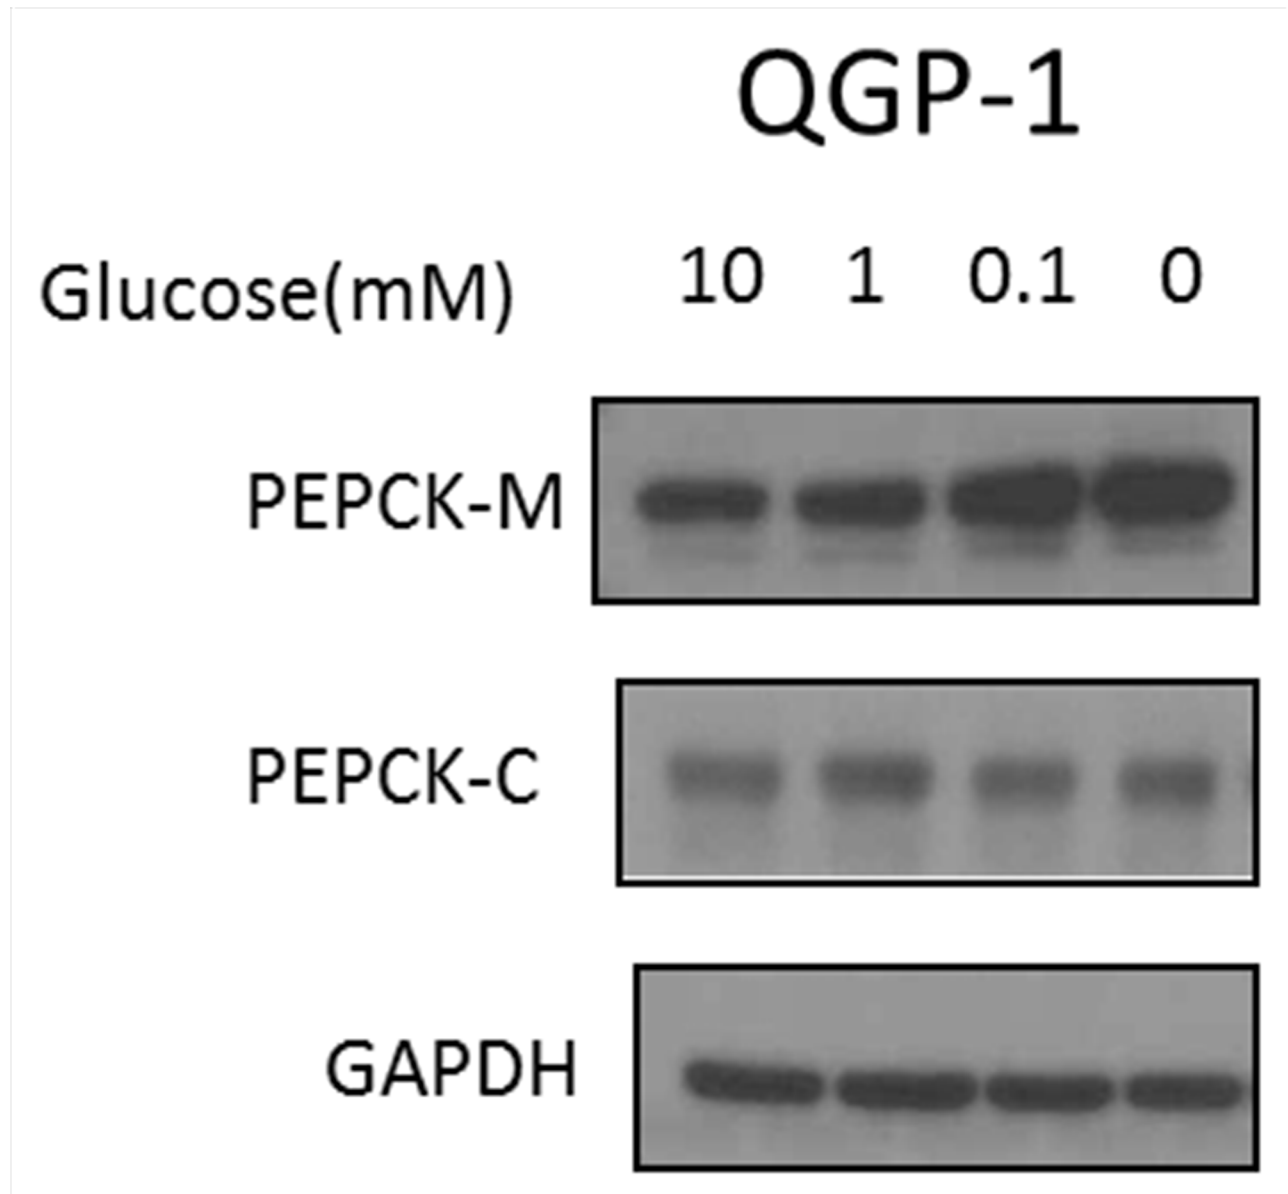

**Supplementary Figure 10: The protein expression of PEPCK-M and PEPCK-C in QGP-1 cells under normal (10mM), low (1, and 0.1mM) or no (0) glucose culture condition. The PEPCK-M expression was increased under low or no glucose condition but the PEPCK-C was not affected by glucose concentration.**

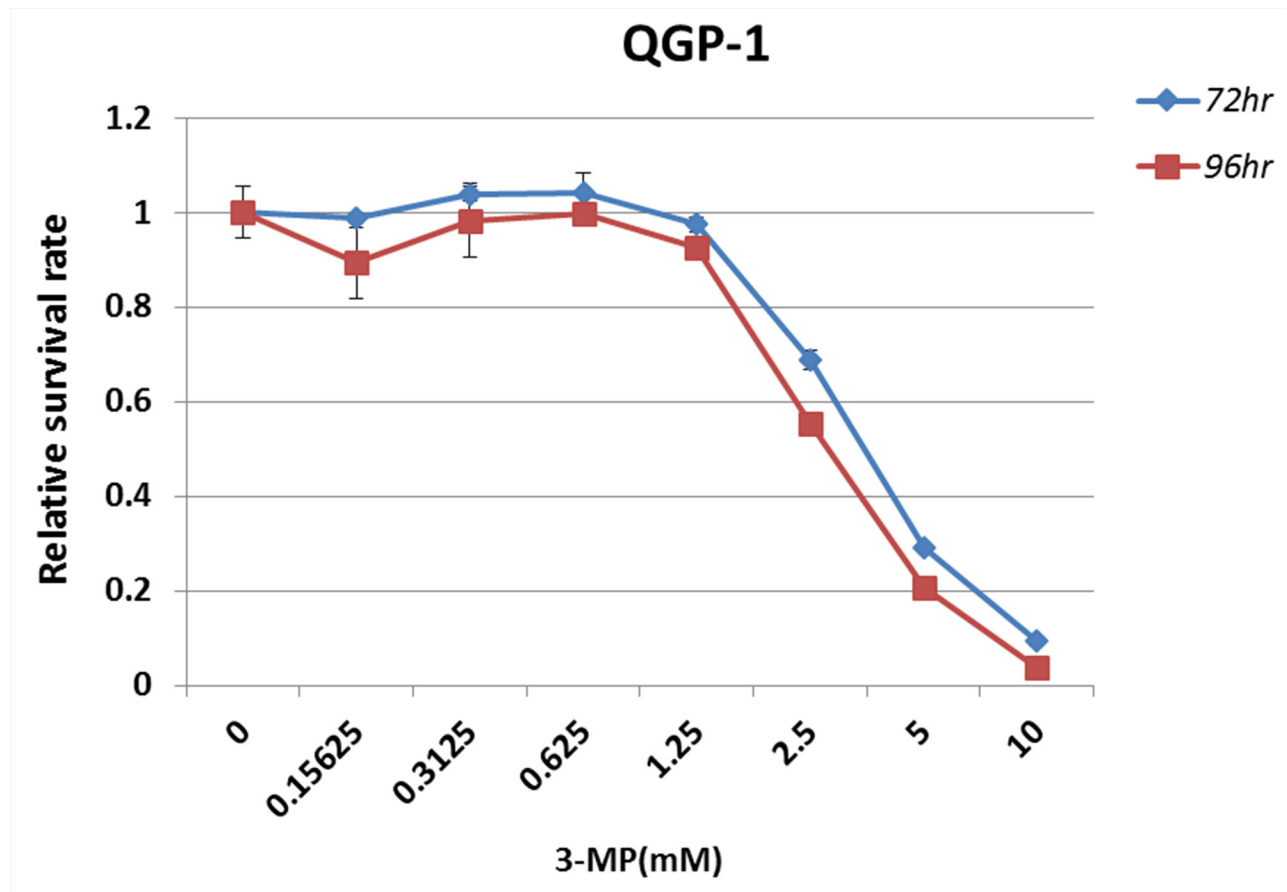

Supplementary Figure 11: The survival rate of QGP-1 cells treated with or without indicated doses of PEPCK inhibitor, 3-MP, for 72 and 96 hours.

Supplementary Table 1: Expression scoring and percentage of PEPCK-M in 21 pNET patients

See Supplementary File 1



Supplementary Table 2: Expression scoring and percentage of PEPCK-C in 21 pNET patients

| patient No. | Tumor grade | normal acinar cells | normal islet cells | pNET     | normal ductal cells |
|-------------|-------------|---------------------|--------------------|----------|---------------------|
| 1           | 2           | -                   | 3+, 100%           | 1+, 100% | -                   |
| 2           | 1           | 0                   | 3+, 100%           | 3+, 80%  | 0                   |
| 3           | 2           | -                   | -                  | 2+, 80%  | -                   |
| 4           | 1           | 0                   | 2+, 100%           | 2+, 90%  | 0                   |
| 5           | 2           | 1+, 80%             | 2+, 100%           | 2+, 100% | 1+, 80%             |
| 6           | 1           | -                   | -                  | 2+, 100% | -                   |
| 7           | 1           | 1+, 20%             | 3+, 100%           | 2+, 60%  | 1+, 20%             |
| 8           | 1           | 1+, 20%             | 3+, 80%            | 3+, 80%  | 1+, 20%             |
| 9           | 2           | 0                   | 3+, 60%            | 3+, 60%  | 0                   |
| 10          | 2           | -                   | -                  | 3+, 100% | 1+, 60%             |
| 11          | 2           | 1+, 40%             | 3+, 100%           | 3+, 80%  | 1+, 80%             |
| 12          | 1           | -                   | -                  | 3+, 80%  | -                   |
| 13          | 1           | 0                   | 2+, 100%           | 2+, 100% | 0                   |
| 14          | 1           | 1+, 10%             | 3+, 100%           | 3+, 100% | 1+, 10%             |
| 15          | 1           | -                   | -                  | 3+, 100% | -                   |
| 16          | 1           | 1+, 20%             | 2+, 90%            | 2+, 80%  | 1+, 40%             |
| 17          | 1           | 0                   | 3+, 100%           | 2+, 80%  | 0                   |
| 18          | 2           | 1+, 20%             | 3+, 100%           | 3+, 80%  | 1+, 20%             |
| 19          | 1           | 1+, 40%             | 3+, 100%           | 3+, 90%  | 1+, 40%             |
| 20          | 1           | 1+, 20%             | 3+, 100%           | 3+, 80%  | 1+, 20%             |
| 21          | 2           | -                   | -                  | 3+, 60%  | -                   |

-, cell not found  
0, no expression

Supplementary Table 3: The up-regulated and down-regulated gene sets in QGP- 1/shPCK2 cells and QGP-1/shLuc cells

See Supplementary File 2

Supplementary Table 4: Sequences of primers for the indicated genes

| Genes          | Forward                          | Reverse                        |
|----------------|----------------------------------|--------------------------------|
| <i>BCAT1</i>   | 5'-CCAAAGCCCTGCTCTTTGTA-3'       | 5'-TGGAGGAGTTGCCAGTTCTT-3'     |
| <i>LDHA</i>    | 5'-GGCCTCTGCCATCAGTATCT-3'       | 5'-GCCGTGATAATGACCAGCTT-3'     |
| <i>G6PD</i>    | 5'-ACGTGATGCAGAACCACCTACTG-3'    | 5'-ACGACGGCTGCAAAAGTGGCG-3'    |
| <i>MCT4</i>    | 5'-GTTGGGTTTGGCACTCAACT-3'       | 5'-GAAGACAGGGCTACCTGCTG-3'     |
| <i>HK2</i>     | 5'-AACCATGACCAAGTGCAGAA-3'       | 5'-AGCCCTTTCTCCATCTCCTT-3'     |
| <i>IDH1</i>    | 5'-GGTGACATACCTGGTACATAACTTTG-3' | 5'-GTGTGCAAAATCTTCAATTGACTT-3' |
| <i>FAM129A</i> | 5'-CCAGGAGTCAGAGGAAGAGAAG-3'     | 5'-GTTGCCACAGGATTCACCAC-3'     |
| <i>WARS</i>    | 5'-CCTCATTCCATTTATTTTACAAA-3'    | 5'-ATGACCAAGGGCAGTTAAA-3'      |
| <i>ACTB</i>    | 5'-GCTGTGCTACGTCGCCCT-3'         | 5'-AAGGTAGTTTCGTGGATGCC-3'     |
